1 **Title:** IVUS Improves Outcomes with SUPERA Stents for the Treatment of Superficial Femoral-  
2 popliteal Artery Disease

3 **Authors:** Prakash Krishnan (Prakash.Krishnan@mountsinai.org)<sup>a</sup>, Raman Sharma  
4 (Raman.Sharma@mountsinai.org)<sup>a</sup>, Sriya Avadhani (Sriya.Avadhani@mountsinai.org)<sup>a</sup>, Arthur  
5 Tarricone ([Arthur.Tarricone@mountsinai.org](mailto:Arthur.Tarricone@mountsinai.org))<sup>a</sup>, Allen Gee (Allen.gee97@gmail.com)<sup>a</sup>, Serdar  
6 Farhan (Serdar.Farhan@mountsinai.org)<sup>a</sup>, Haroon Kamran (Haroon.Kamran@mountsinai.org)<sup>a</sup>,  
7 Annapoorna Kini (Annapoorna.Kini@mountsinai.org)<sup>a</sup>, Samin Sharma  
8 ([Samin.Sharma@mountsinai.org](mailto:Samin.Sharma@mountsinai.org))<sup>a</sup>

### 9 **Affiliations**

10 a. Icahn School of Medicine at the Mount Sinai Hospital  
11 The Zena and Michael A. Wiener Cardiovascular Institute and the Marie-Josée and Henry R.  
12 Kravis Cardiovascular Health Center, Department of Medicine/Cardiology, Icahn School of  
13 Medicine at Mount Sinai, New York, NY

### 14 **Grant Support**

15 There was not grant support for this manuscript

### 16 **Correspondence**

17 Prakash Krishnan MD FACC  
18 Phone Number: 212-241-6032  
19 Fax Number: 212-348-7908  
20 1 Gustave L. Levy Place Box 1030  
21 New York, NY 10029  
22 [Prakash.Krishnan@mountsinai.org](mailto:Prakash.Krishnan@mountsinai.org)

### 23 **FINANCIAL DISCLOSURES**

24 All authors have no financial disclosures to make

25

26

27

28

29

30 **Abstract (210 words)**

31 Objectives: To determine the effect of intravenous ultrasound (IVUS) when used adjunctively  
32 with nitinol interwoven bare metal stents in the management of femoropopliteal lesions.

33  
34 Background: Nitinol interwoven bare metal stents represent an advancement in stent technology;  
35 however nominal deployment remains an area of focus. Intravascular Ultrasound (IVUS) has  
36 been shown to improve outcomes in both the coronary and peripheral vasculature by providing  
37 the operator with greater vessel detail. The use of adjunctive IVUS with Nitinol bare metal  
38 stents has not been widely studied.

39  
40 Methods: This study included a cohort of 200 consecutive patients with peripheral artery disease.  
41 All patients were treated with  $\geq 1$  Supera bare metal stent, and 91 received adjunctive IVUS  
42 imaging prior to stent deployment. Deployment conditions of nominal, compressed, and  
43 elongated were measured and the primary clinical outcomes included target lesion reintervention,  
44 major and minor, below the knee amputation, and mortality.

45  
46 Results: The patients who received IVUS had a significantly greater number of nominally  
47 deployed stents ( $p < 0.001$ ). Patients who had IVUS imaging also had significantly lower  
48 reintervention rates compared to those who did not receive IVUS imaging ( $p = 0.047$ ).

49  
50 Conclusion: IVUS and angiography decreases clinically driven target lesion reintervention and  
51 increases nominal deployment compared to angiography alone in femoropopliteal lesions treated  
52 with interwoven bare metal nitinol stents.

53 **Keywords**

54 Intravenous Ultrasound, Supera, Stent, Peripheral Artery Disease

55

56 **Condensed Abstract (93 words)**

57 This retrospective study was done to examine the utility of intravenous ultrasound when used  
58 adjunctively for visualization in the management of femoropopliteal lesions in peripheral artery  
59 disease patients. There was total of 200 subjects and all were treated using the Supera nitinol  
60 self-expanding stent. By the end of the study, the group of subjects treated with intravenous  
61 ultrasound had significantly fewer reinterventions and had a greater rate of nominally deployed  
62 stents. These findings suggest the beneficial role intravenous ultrasound has compared to  
63 angiography alone in the management of femoropopliteal lesions with Supera stents.

64

65 **Abbreviations**

66 PAD = Peripheral Artery Disease

67 CD-TLR = Clinically Driven Target Lesion Reintervention

68 IVUS = Intravascular Ultrasound

69 PTA = Percutaneous Transluminal Angioplasty

70 DCB = Drug Coated Balloon

71

72

73

74

75

## 76 **Introduction**

77           Peripheral Artery Disease (PAD) affects over 200 million people globally with increasing  
78 prevalence among the elderly (>80 years) population.(1) Endovascular management of PAD has  
79 become the mainstay for treatment; however long term patency remains an area of focus.  
80 Endovascular intervention success is multifactorial, with outcomes influenced by multiple  
81 variables ranging from clinical presentation to appropriate interpretation of angiography.(2,3)  
82 Stent malposition due to over or under sizing has been observed to result in increased clinically  
83 driven target lesion reintervention (CD-TLR) and decrease in primary patency. Intravascular  
84 Ultrasound (IVUS) has been shown to improve outcomes in both the coronary and peripheral  
85 vasculature by providing the operator with greater vessel detail specifically assessment of plaque  
86 buildup, measurement of lumen diameter, and possible assurance of proper stent deployment.(4)  
87 In the peripheral vasculature, IVUS use has been observed to significantly improve primary and  
88 secondary patency, freedom from any reintervention, freedom from any adverse limb event,  
89 protective against vascular and non-vascular complications, and increase event-free survival  
90 compared to angiography alone.(5-7)

91           The interwoven nitinol stent (Supera) represents an advancement in stenting technology  
92 and has been shown to improve primary patency compared to bare metal stents, with rates  
93 published as high as 90%.(8-11) Logical explanation of this improvement may be attributed to  
94 the inherent helical structure of Supera, allowing greater resistance to compressive arterial forces  
95 and resilience to stent fractures.(12) However, there has been variation in the success of studies,  
96 with patency rates of Supera ranging from 55% -90%.(13,14) One factor that have been  
97 speculated attributing to this variation is the mal-deployment of the Supera stents; and with fewer  
98 nominally deployed stents, there will likely be greater target lesion revascularization.(15) While

99 nominal deployment is always the operator's objective, success of this has only been observed in  
100 approximately 50% of treated subjects. The adjunctive use of IVUS with Supera stent technology  
101 has not been widely studied and the objective of this analysis is to examine a cohort of  
102 femoropopliteal PAD patients treated with Supera and IVUS vs Supera alone to observe  
103 differences in both deployment condition as well as clinical outcomes.

104

## 105 **Methods**

106       Between March 2010 to March 2020, 200 consecutive patients were treated for  
107 femoropopliteal PAD with Supera stents. All patients were adults (age  $\geq 18$  years), had a  
108 confirmed clinical diagnosis of PAD, and were treated with at least one ( $\geq 1$ ) Supera stent. All  
109 patients were treated by guideline directed medical therapy. This study was approved by the  
110 Institutional Review Board of the Icahn School of Medicine at the Mount Sinai Hospital:  
111 Program of Protection of Human Subjects Committee.

112       The utility of adjunctive procedures and the duration of dual antiplatelet therapy was  
113 under the discretion of the treating physician. Standard institutional practice of clopidogrel  
114 (75mg/day), and aspirin (81mg) for 3 months were followed for post-procedure therapy.  
115 Deployment conditions were assessed based on angiogram review and conditions were classified  
116 as nominal, compressed, and elongated by two physicians independently. All disagreements were  
117 resolved by the corresponding author

118       All angiograms were anonymized prior to review by the data collection team. Reference  
119 vessel diameter was established through angiography or IVUS analysis when available. The  
120 estimation of compression and elongation was determined by the operator, by dividing the  
121 nominal stent length according to package insertion directions. Actual deployment length was

122 measured using a preprocedural attached measuring scale. Optical evaluation of the complete  
123 stent was then conducted to examine for signs of elongation or compression. In keeping with the  
124 findings in the SUPERB trial<sup>7</sup>, the authors defined the final three Supera stent dimensions as  
125 elongation ( $\geq 10\%$  of package insert length), compression ( $\leq 10\%$  of package insert length), and  
126 nominal ( $-10\% \leq \text{Length} \leq +10\%$  of package insert length). 10% was chosen due to the increase  
127 in CD-TLR observed in the SUPERB trial<sup>7</sup> when the Supera deployment was either compressed  
128 or elongated greater than 10%.

129 IVUS was performed using a system (Philips Healthcare) for all subsequent cases.  
130 Images were acquired with a Volcano Eagle Eye(0.014-inch guidewire) or PV018 (0.018in guide  
131 wire) solid-state phased array IVUS catheters. All the treating operators were experienced in the  
132 use and interpretation of IVUS and IVUS was performed after pre-dilation and prior to stent  
133 deployment. In cases with chronic total occlusion, pretreatment IVUS imaging was performed  
134 after crossing of the occlusion. Manual pull back performed at a steady rate under fluoroscopic  
135 imaging with bookmarking of frames at regular distances in relation to the radiopaque ruler for  
136 all cases. In addition for all cases, the frame rate was set to maximum and gain and field of view  
137 were optimized. Pullback acquisitions and saved still images were archived on softlink  
138 international and saved for later analysis. IVUS diameter measurements were obtained at the  
139 time of the procedure using the control module measurement software. IVUS diameters of the  
140 proximal and distal Reference Vessel Diameter (RVD) were obtained at the most normal  
141 appearing section immediately adjacent to the lesion. The IVUS diameter was measured in  
142 millimeters and obtained following institutional guidelines by measuring the distance between  
143 the intima-lumen boundaries in orthogonal planes and calculating the mean measurement. The  
144 larger of the two measurements was used as the IVUS RVD. IVUS lesion length (mm) was

145 estimated by identifying the proximal and distal edge of the lesion according to IVUS while  
146 under direct fluoroscopic control, and the distance between these points was measured using the  
147 angiographic imaging length measurement technique described previously. Additional  
148 information including the presence of post-angioplasty dissection was also obtained.

149 Associations were determined between Supera and the IVUS and non-IVUS groups, with  
150 examination of the clinical outcome variables: re-intervention, mortality, and amputation. T-tests  
151 or Chi-squares were used to compare continuous and categorical variables, respectively through  
152 the utility of IBM SPSS Statistical viewer. Associations were presented as Odds Ratios (O.R),  
153 Confidence Interval (C.I), p-value. A  $p \leq 0.05$  was considered significant. All continuous  
154 variables were presented as mean  $\pm$  standard deviation. Logistic regression models were also  
155 conducted in SPSS, using the clinical outcomes: re-intervention, mortality, and amputation as  
156 dependent variables and covariates as the variables that were considered significant in the  
157 univariate analysis.

158

## 159 **Results**

160 A total of 236 SUPERA stents were used to treat 200 patients with lower limb  
161 claudication or critical limb ischemia. Ninety one of these patients received IVUS imaging,  
162 which was conducted in accordance with institution protocol. After angiographic review, all  
163 cases were universally agreed upon. 164 limbs were treated with a single Supera stent, while 36  
164 limbs were treated with  $>1$  Supera stents. In the case of the 36 limbs treated with  $>1$  Supera  
165 stents, total stent length was used in order to determined compressed, nominal, or elongated.  
166 Baseline and lesion characteristics were similar between both IVUS and non-IVUS treated  
167 cohorts. Vessel diameter was observed to be significantly larger in the IVUS subgroup (5.13mm

168 vs 4.89mm,  $p < 0.001$ ), lesion length (117.47mm vs 90.64mm  $p < 0.001$ ), dissection (52.7% vs  
169 22.0%,  $p < 0.001$ ) and calcification was also observed to be more frequent in the IVUS subgroup  
170 (Table 1 and 2).

171 All vessel preparation devices were utilized at the discretion of the operator and included  
172 percutaneous transluminal angioplasty (PTA), drug coated balloons (DCB), atherectomies or  
173 thrombectomy (Table 3). There were no significant differences in the adjunctive methods  
174 between subgroups. There was a significant difference in the Supera stent size used within the  
175 IVUS + angiography cohort compared to angiography alone, with more 5.5mm (36/91 (40%) vs  
176 36/109 (33%)  $p < 0.05$ ) and 6.0mm (33/91(36%) vs 15/109(14%),  $p < 0.05$ ). IVUS utility was  
177 associated with a lower CD-TLR: O.R = 0.482 [CI: 0.233,0.998] ( $p = 0.047$ ). There was no  
178 observed difference in lower extremity amputation between the two cohorts: O.R = 0.891  
179 [CI:0.298, 2.670] ( $p = 0.837$ ).

180 IVUS was also associated with stent deployment status. Nominal deployment was  
181 achieved more frequently in the presence of IVUS utility: O.R = 2.674 [CI: 1.507,4.747],  
182  $p < 0.001$ ), while elongated deployment was observed greater in the non-IVUS treated population  
183 (OR = 3.523 [CI: 1.709, 7.267],  $p < 0.001$ ) (Table 4). There was a greater rate of compressed  
184 deployment in the non-IVUS subgroup, however this was not statistically significant.

185 The number needed to treat/number needed to harm (NNT/NNH), with the outcome of  
186 re-intervention, showed that on average, 8.3 patients would have to be treated with over not  
187 being treated with IVUS in order to have one additional patient not have an re-vascularization  
188 event.

189

190 **Discussion**



191 Current findings of this study highlight the plausible benefit of adjunctive IVUS use with  
192 Supera stent utilization. Significant differences were observed in angiography + IVUS compared  
193 to angiography alone cohorts with regard to RVD (5.13mm vs 4.89mm ,  $p<0.5$ ), lesion  
194 length(117.47 vs 90.64 ,  $p<0.5$ ), calcification (35 vs 14 ,  $p<0.001$ ), and dissection (48 vs 20 ,  
195  $p<0.001$ ). Across the primary clinical outcomes, the group treated with IVUS-guidance and  
196 Supera proceeded to show a significantly lower rate of re-intervention in comparison to the  
197 Supera + angiography alone group at 12 months .

198 Across the board, IVUS has been well regarded for improving clinical outcomes within  
199 coronary and iliac lesions, and continues to grow prominence in the scope of peripheral  
200 intervention.(16-19) The addition of IVUS in peripheral vascular intervention, has been shown  
201 to reduce short term and long term major adverse limb events (MALE) and decreased binary  
202 restenosis in complete total occlusion (CTO).(20,21) A recent randomized controlled trial  
203 comparing angiography + IVUS to angiography alone in femoropopliteal interventions reported  
204 decreased binary restenosis when utilizing IVUS + angiography compared to angiography alone  
205 at 12 months; and observed a high rate of disagreement in imaging findings including RVD and  
206 lesion length, both of which were underestimated with angiography alone.(22) As endovascular  
207 therapies evolve the importance of precise imaging becomes heightened. In the case of DCB  
208 underestimating the RVD may result in poor apposition of DCB to vessel wall and ultimately  
209 suboptimal drug delivery.(22) Mal-deployment of SUPERA has been suggested as plausible  
210 explanation for the large variation of in CD-TLR across the literature with elongation carrying  
211 the greatest risk of restenosis compared to nominal deployment.(15) The addition of IVUS has  
212 been shown to affect medical decision making with regard to sizing of interventional device,  
213 while the goal of our study was not to assess change in management as a result of IVUS use, the

214 authors did find significant differences in lesion characteristics including RVD, lesion length,  
215 calcification and dissection.(22) In addition to these findings the Supera devices used in IVUS +  
216 angiography arm were significantly larger than that of angiography alone arm and resulted in  
217 significantly more nominal deployments than angiography alone (52.3% vs 38.5%,  $p<0.001$ ).

218 While Supera on its own has historically been effective at treating infra-inguinal  
219 superficial femoral artery lesions, the fact remains that sizing is a difficult variable to  
220 control.(15,23) In our study, the use of IVUS likely attributed to improved vessel prep,  
221 deployment, and ultimately more accurate sizing of Supera stent leading to the observed  
222 reduction in CD-TLR. Consistent use of IVUS may improve accurate vessel measurements and  
223 possibly reduce the error in stent deployment. These factors in combination could improve the  
224 long term clinical outcomes of endovascular procedures.

225 Due to the retrospective design of this study, only associations could be determined from  
226 the results. Another limitation was that mortality data was collected solely through EPIC records,  
227 since social security numbers were often unavailable, preventing cross verification with national  
228 death indexes. The present study also consists of a population from a heavily concentrated urban  
229 location, making out findings less representative of all populations.

230

### 231 **Conclusion:**

232 IVUS and angiography decreases clinically driven target lesion reintervention and increases  
233 nominal deployment compared to angiography alone in femoropopliteal lesions treated with  
234 interwoven bare metal nitinol stents.

235

### 236 **Perspectives**

237 IVUS has been known to improve patency, protect from vascular adverse events, and reduce the  
238 need for reintervention. This study explores IVUS as an adjunctive imaging method in the  
239 management of femoropopliteal lesions with the Supera interwoven bare metal nitinol stents.  
240 IVUS with angiography shows improved nominal deployment and reduced CD-TLR when  
241 adjunctively used with Supera stents.

242

## 243 **References**

244

- 245 1. Shu J, Santulli G. Update on peripheral artery disease: Epidemiology and  
246 evidence-based facts. *Atherosclerosis* 2018;275:379-381.
- 247 2. Zhao HQ, Nikanorov A, Virmani R, Jones R, Pacheco E, Schwartz LB. Late stent  
248 expansion and neointimal proliferation of oversized Nitinol stents in peripheral  
249 arteries. *Cardiovasc Intervent Radiol* 2009;32:720-6.
- 250 3. Richard R S. The Importance of Accurate Femoropopliteal Artery Sizing in  
251 Endovascular Therapy. *Endovascular Today* 2012.
- 252 4. Fornell D. Understanding Intravascular Ultrasound (IVUS) Systems. *Diagnostic*  
253 *and Interventional Cardiology* 2009.
- 254 5. Iida O, Takahara M, Soga Y et al. Efficacy of intravascular ultrasound in  
255 femoropopliteal stenting for peripheral artery disease with TASC II class A to C  
256 lesions. *J Endovasc Ther* 2014;21:485-92.
- 257 6. Panaich SS, Arora S, Patel N et al. Intravascular Ultrasound in Lower Extremity  
258 Peripheral Vascular Interventions: Variation in Utilization and Impact on In-  
259 Hospital Outcomes From the Nationwide Inpatient Sample (2006-2011). *J*  
260 *Endovasc Ther* 2016;23:65-75.
- 261 7. Krishnan P, Tarricone A, Gee A et al. Analysis of Interwoven Nitinol Stenting for  
262 the Treatment of Critical Limb Ischemia: Outcomes From an Average 3-Year  
263 Follow-up Period. *Angiology* 2022;73:407-412.
- 264 8. Hiramoto JS, Teraa M, de Borst GJ, Conte MS. Interventions for lower extremity  
265 peripheral artery disease. *Nat Rev Cardiol* 2018;15:332-350.
- 266 9. Meng FC, Chen PL, Lee CY, Shih CC, Chen IM. Real-World Comparison of Drug-  
267 Eluting and Bare-Metal Stents in Superficial Femoral Artery Occlusive Disease  
268 with Trans-Atlantic Intersociety Consensus B Lesions: A 2-Year, Single-Institute  
269 Study. *Acta Cardiol Sin* 2018;34:130-136.
- 270 10. Ruiz CF, San Norberto García E, Domingos LF et al. supera Stent in Popliteal  
271 Artery, 2 Years Follow-up Results. *European Journal of Vascular and*  
272 *Endovascular Surgery* 2019;58:e455.

- 273 11. Werner M, Paetzold A, Banning-Eichenseer U et al. Treatment of complex  
274 atherosclerotic femoropopliteal artery disease with a self-expanding interwoven  
275 nitinol stent: midterm results from the Leipzig SUPERA 500 registry.  
276 *EuroIntervention* 2014;10:861-8.
- 277 12. Garcia L, Jaff MR, Metzger C et al. Wire-Interwoven Nitinol Stent Outcome in the  
278 Superficial Femoral and Proximal Popliteal Arteries: Twelve-Month Results of the  
279 SUPERB Trial. *Circ Cardiovasc Interv* 2015;8.
- 280 13. de Boer SW, van den Heuvel DAF, de Vries-Werson DAB et al. Short-term Results  
281 of the RAPID Randomized Trial of the Legflow Paclitaxel-Eluting Balloon With  
282 Supera Stenting vs Supera Stenting Alone for the Treatment of Intermediate and  
283 Long Superficial Femoral Artery Lesions. *J Endovasc Ther* 2017;24:783-792.
- 284 14. San Norberto EM, Flota CM, Fidalgo-Domingos L, Taylor JH, Vaquero C. Real-  
285 World Results of Supera Stent Implantation for Popliteal Artery Atherosclerotic  
286 Lesions: 3-Year Outcome. *Ann Vasc Surg* 2020;62:397-405.
- 287 15. Garcia LA, Rosenfield KR, Metzger CD et al. SUPERB final 3-year outcomes using  
288 interwoven nitinol biomimetic supera stent. *Catheterization and Cardiovascular  
289 Interventions* 2017;89:1259-1267.
- 290 16. Buckley CJ, Arko FR, Lee S et al. Intravascular ultrasound scanning improves long-  
291 term patency of iliac lesions treated with balloon angioplasty and primary  
292 stenting. *J Vasc Surg* 2002;35:316-23.
- 293 17. Kim BK, Shin DH, Hong MK et al. Clinical Impact of Intravascular Ultrasound-  
294 Guided Chronic Total Occlusion Intervention With Zotarolimus-Eluting Versus  
295 Biolimus-Eluting Stent Implantation: Randomized Study. *Circ Cardiovasc Interv*  
296 2015;8:e002592.
- 297 18. Liu XM, Yang ZM, Liu XK et al. Intravascular ultrasound-guided drug-eluting stent  
298 implantation for patients with unprotected left main coronary artery lesions: A  
299 single-center randomized trial. *Anatol J Cardiol* 2019;21:83-90.
- 300 19. Tan Q, Wang Q, Liu D, Zhang S, Zhang Y, Li Y. Intravascular ultrasound-guided  
301 unprotected left main coronary artery stenting in the elderly. *Saudi Med J*  
302 2015;36:549-53.
- 303 20. Divakaran S, Parikh SA, Hawkins BM et al. Temporal Trends, Practice Variation,  
304 and Associated Outcomes With IVUS Use During Peripheral Arterial Intervention.  
305 *JACC Cardiovasc Interv* 2022;15:2080-2090.
- 306 21. Tsujimura T, Iida O, Takahara M et al. Clinical Impact of Intravascular  
307 Ultrasound-Guided Fluoropolymer-Based Drug-Eluting Stent Implantation for  
308 Femoropopliteal Lesions. *JACC: Cardiovascular Interventions* 2022;15:1569-1578.
- 309 22. Allan RB, Puckridge PJ, Spark JI, Delaney CL. The Impact of Intravascular  
310 Ultrasound on Femoropopliteal Artery Endovascular Interventions: A  
311 Randomized Controlled Trial. *JACC Cardiovasc Interv* 2022;15:536-546.
- 312 23. Palena LM, Diaz-Sandoval LJ, Sultato E et al. Feasibility and 1-Year outcomes of  
313 subintimal revascularization with supera<sup>®</sup> stenting of long femoropopliteal  
314 occlusions in critical limb ischemia: The "Supersub" Study. *Catheter Cardiovasc  
315 Interv* 2017;89:910-920.
- 316

317 **Tables**

318 Table 1: Baseline

319 Table 2: Clinical Parameters

320 Table 3: Adjunctive Therapies

321 Table 4: Outcomes

| Table 1: Baseline       | IVUS (-) n=109 | IVUS (+) n=91 | p     |
|-------------------------|----------------|---------------|-------|
| Age                     | 71.4 ± 10.6    | 72 ± 9.5      | 0.726 |
| Gender                  |                |               |       |
| Male                    | 58 (53.2%)     | 44 (48.4%)    | 0.948 |
| Female                  | 51 (46.8%)     | 47 (51.6%)    | 0.948 |
| Diabetes Mellitus       | 73(67.0%)      | 69 (75.8%)    | 0.170 |
| Statin User             | 95 (87.1%)     | 82 (90.1%)    | 0.515 |
| Smoker                  | 87 (80.0%)     | 62 (68.1%)    | 0.059 |
| Coronary Artery Disease | 90 (82.6%)     | 68 (74.7%)    | 0.175 |
| Critical Limb Ischemia  | 35 (32.1%)     | 28 (30.8%)    | 0.839 |
| Hypertension            | 102 (93.6%)    | 89 (97.8%)    | 0.151 |
| Hyperlipidemia          | 102 (93.6%)    | 86 (94.5%)    | 0.783 |
| Rutherford              |                |               |       |
| 1                       | 0 (0.0%)       | 0 (0.0%)      | N.A   |
| 2                       | 3 (2.8%)       | 3 (3.3%)      | 0.822 |
| 3                       | 71 (65.1%)     | 49 (53.8%)    | 0.105 |
| 4                       | 34 (31.2%)     | 31 (34.1)     | 0.666 |
| 5                       | 12 (11.0%)     | 7 (7.7%)      | 0.428 |
| 6                       | 3 (2.8%)       | 1 (1.1%)      | 0.422 |

| Table 2: Clinical Parameters     | IVUS (-) n=109 | IVUS (+) n=91 | p      |
|----------------------------------|----------------|---------------|--------|
| <b>Reference Vessel Diameter</b> |                |               |        |
| (mm)                             | 4.89 ± 0.79    | 5.13 ± 0.78   | <0.001 |
| 4                                | 43 (39.4%)     | 11 (12.1%)    | <0.001 |
| 4.5                              | 5 (4.6%)       | 0 (0.0%)      | N.A    |
| 5                                | 10 (9.2%)      | 11 (12.1%)    | 0.528  |
| 5.5                              | 36 (33.0%)     | 36 (39.6%)    | 0.338  |
| 6                                | 15 (13.8%)     | 33 (36.3%)    | <0.001 |
| <b>Total Stent Length (mm)</b>   |                |               |        |
|                                  | 98.44 ± 36.44  | 120.3 ± 25.38 | 0.042  |
| 40                               | 8 (7.3%)       | 10 (11.0%)    | 0.372  |
| 60                               | 22 (20.2%)     | 28 (30.8%)    | 0.087  |
| 80                               | 23 (21.1%)     | 11 (12.1%)    | 0.095  |
| 100                              | 11 (10.1%)     | 11 (12.1%)    | 0.653  |
| 120                              | 20 (18.3%)     | 19 (20.9%)    | 0.653  |
| 150                              | 25 (22.9%)     | 12 (13.2%)    | 0.083  |
| <b>Lesion Length (mm)</b>        |                |               |        |
|                                  | 90.64 ± 41.7   | 117.47 ± 49.3 | <0.001 |
| <b>Average Vessel Runoff</b>     |                |               |        |
|                                  | 1.7 ± 1.0      | 1.7 ± 1.0     | 0.303  |
| <b>Vessel Runoff (#)</b>         |                |               |        |
| 0                                | 12 (11.0%)     | 13 (14.3%)    | 0.485  |
| 1                                | 33 (30.3%)     | 31 (34.1%)    | 0.567  |
| 2                                | 32 (29.4%)     | 21 (23.1%)    | 0.316  |
| 3                                | 29 (26.6%)     | 26 (28.6%)    | 0.757  |
| <b>Chronic Total Occlusion</b>   |                |               |        |
|                                  | 46 (42.2%)     | 32 (35.2%)    | 0.310  |

---

|               |            |            |        |
|---------------|------------|------------|--------|
| Calcification | 14 (12.8%) | 35 (38.5%) | <0.001 |
| Dissection    | 20 (22.0%) | 48 (52.7%) | <0.001 |
| Thrombus      | 5 (4.6%)   | 10 (11.0%) | 0.087  |
| Recoil        | 4 (3.7%)   | 1 (1.1%)   | 0.246  |
| Perforation   | 2 (1.8%)   | 0 (0.0%)   | 0.194  |

---



| Table 3: Adjunctive Therapies | IVUS (-) n=109 | IVUS (+) n=91 | p     |
|-------------------------------|----------------|---------------|-------|
| DCB                           | 48 (44.0%)     | 38 (41.8%)    | 0.746 |
| PTA                           | 61 (56.0%)     | 54 (59.3%)    | 0.630 |
| Thrombectomy                  | 3 (2.8%)       | 0 (0.0%)      | 0.910 |
| Laser Atherectomy             | 1 (1.1%)       | 0 (0.0%)      | 0.951 |
| Directional Atherectomy       | 86 (78.9%)     | 75 (82.4%)    | 0.532 |

| Table 4: Outcomes | IVUS (-) n=109 | IVUS (+) n=91 | p      |
|-------------------|----------------|---------------|--------|
| <hr/>             |                |               |        |
| Deployment        |                |               |        |
| Nominal           | 42 (38.5%)     | 57 (52.3%)    | <0.001 |
| Compressed        | 29 (26.6%)     | 22 (20.2%)    | 0.694  |
| Elongated         | 38 (34.9%)     | 12 (11.0%)    | <0.001 |
| Amputation        | 8 (7.3%)       | 6 (6.6%)      | 0.837  |
| Mortality         | 8 (7.3%)       | 4 (4.4%)      | 0.383  |
| Re-intervention   | 28 (25.7%)     | 13 (14.3%)    | 0.047  |
| <hr/>             |                |               |        |
